# Supplementary material
Source: Springer Nature journal article supplement (https://www.springermedizin.de/resource/supplementary/12889_2014_6863_MOESM1_ESM.pdf/9499208)

# VIETNAM

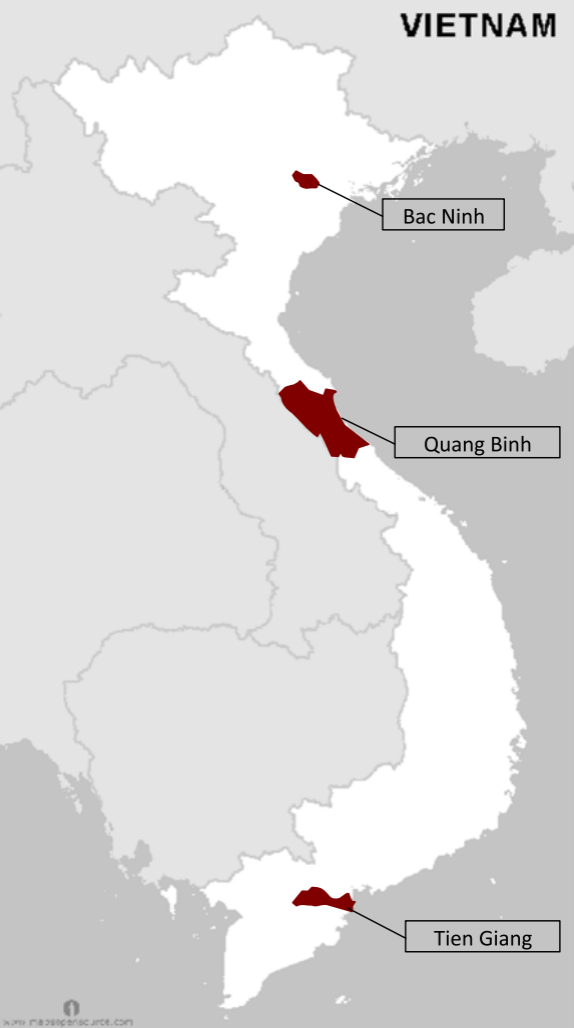

Bac Ninh

Quang Binh

Tien Giang

Supplement: MOESM1 [file 9499208]
